# Supplementary material
Source: publisher site journal article supplement (https://www.spandidos-publications.com/5371/downloadSupplementary)
Supplement: Supplementary file 1 [file downloadSupplementary]

## Sheet: Table_SIII
Table SIII. Result of Gene Ontology enrichment analysis for clusters 1 and 2.
A, Cluster 1
#pathway ID	Pathway description	Observed gene count	Background gene count	Strength	False discovery rate	Matching proteins in the network (labels)	Matching proteins in the network (IDs)
GO:0042116	Macrophage activation	5	53	1.28	0.0026	NAMPT,SLC11A1,IFNGR1,DYSF,FPR2	9606.ENSP00000222553,9606.ENSP00000233202,9606.ENSP00000356713,9606.ENSP00000386881,9606.ENSP00000468897
GO:0070488	Neutrophil aggregation	2	2	2.3	0.0280	S100A8,S100A9	9606.ENSP00000357722,9606.ENSP00000357727
B, Cluster 2
#pathway ID	Pathway description	Observed gene count	Background gene count	Strength	False discovery rate	Matching proteins in the network (labels)	Matching proteins in the network (IDs)
GO:0006614	SRP-dependent cotranslational protein targeting to membrane	9	96	1.98	2.93e-12	RPL38,RPLP1,RPS6,RPL14,RPL37A,RPS13,RPL36,RPS28,RPS5	9606.ENSP00000309830,9606.ENSP00000346037,9606.ENSP00000369757,9606.ENSP00000379506,9606.ENSP00000418082,9606.ENSP00000435777,9606.ENSP00000464342,9606.ENSP00000472469,9606.ENSP00000472985
GO:0000184	Nuclear-transcribed mRNA catabolic process, nonsense-mediated decay	9	119	1.89	3.18e-12	RPL38,RPLP1,RPS6,RPL14,RPL37A,RPS13,RPL36,RPS28,RPS5	9606.ENSP00000309830,9606.ENSP00000346037,9606.ENSP00000369757,9606.ENSP00000379506,9606.ENSP00000418082,9606.ENSP00000435777,9606.ENSP00000464342,9606.ENSP00000472469,9606.ENSP00000472985
GO:0019083	Viral transcription	9	115	1.91	3.18e-12	RPL38,RPLP1,RPS6,RPL14,RPL37A,RPS13,RPL36,RPS28,RPS5	9606.ENSP00000309830,9606.ENSP00000346037,9606.ENSP00000369757,9606.ENSP00000379506,9606.ENSP00000418082,9606.ENSP00000435777,9606.ENSP00000464342,9606.ENSP00000472469,9606.ENSP00000472985
GO:0006413	Translational initiation	9	141	1.82	9.30e-12	RPL38,RPLP1,RPS6,RPL14,RPL37A,RPS13,RPL36,RPS28,RPS5	9606.ENSP00000309830,9606.ENSP00000346037,9606.ENSP00000369757,9606.ENSP00000379506,9606.ENSP00000418082,9606.ENSP00000435777,9606.ENSP00000464342,9606.ENSP00000472469,9606.ENSP00000472985
GO:0090150	Establishment of protein localization to membrane	10	267	1.59	2.89e-11	RPL38,MAL,RPLP1,RPS6,RPL14,RPL37A,RPS13,RPL36,RPS28,RPS5	9606.ENSP00000309830,9606.ENSP00000310880,9606.ENSP00000346037,9606.ENSP00000369757,9606.ENSP00000379506,9606.ENSP00000418082,9606.ENSP00000435777,9606.ENSP00000464342,9606.ENSP00000472469,9606.ENSP00000472985
GO:0042274	Ribosomal small subunit biogenesis	4	70	1.77	0.00020	RPL38,RPS6,RPS28,RPS5	9606.ENSP00000309830,9606.ENSP00000369757,9606.ENSP00000472469,9606.ENSP00000472985
GO:0002181	Cytoplasmic translation	4	72	1.76	0.00022	RPL38,RPLP1,RPL36,RPS28	9606.ENSP00000309830,9606.ENSP00000346037,9606.ENSP00000464342,9606.ENSP00000472469
GO:0000028	Ribosomal small subunit assembly	3	18	2.23	0.00028	RPL38,RPS28,RPS5	9606.ENSP00000309830,9606.ENSP00000472469,9606.ENSP00000472985
GO:0042254	Ribosome biogenesis	5	292	1.25	0.0017	RPL38,RPS6,RPL14,RPS28,RPS5	9606.ENSP00000309830,9606.ENSP00000369757,9606.ENSP00000379506,9606.ENSP00000472469,9606.ENSP00000472985
GO:0045621	Positive regulation of lymphocyte differentiation	3	102	1.48	0.0192	LEF1,CD27,FLT3LG	9606.ENSP00000265165,9606.ENSP00000266557,9606.ENSP00000469613
GO:0051251	Positive regulation of lymphocyte activation	4	286	1.16	0.0214	CCR7,LEF1,CD27,FLT3LG	9606.ENSP00000246657,9606.ENSP00000265165,9606.ENSP00000266557,9606.ENSP00000469613
C, Cluster 3
#pathway ID	Pathway description	Observed gene count	Background gene count	Strength	False discovery rate	Matching proteins in the network (labels)	Matching proteins in the network (IDs)
GO:0009615	Response to virus	9	293	1.74	3.02e-11	HERC5,PARP9,IFIT1,IFIT3,IFIT2,LCN2,ISG15,TRIM22,DEFA1B	9606.ENSP00000264350,9606.ENSP00000353512,9606.ENSP00000360869,9606.ENSP00000360883,9606.ENSP00000360891,9606.ENSP00000362108,9606.ENSP00000368699,9606.ENSP00000369299,9606.ENSP00000372136
GO:0045087	Innate immune response	10	703	1.4	2.14e-10	HERC5,CAMP,PARP9,IFIT1,IFIT3,IFIT2,LCN2,ISG15,TRIM22,DEFA1B	9606.ENSP00000264350,9606.ENSP00000296435,9606.ENSP00000353512,9606.ENSP00000360869,9606.ENSP00000360883,9606.ENSP00000360891,9606.ENSP00000362108,9606.ENSP00000368699,9606.ENSP00000369299,9606.ENSP00000372136
GO:0051607	Defense response to virus	8	210	1.83	2.14e-10	HERC5,PARP9,IFIT1,IFIT3,IFIT2,ISG15,TRIM22,DEFA1B	9606.ENSP00000264350,9606.ENSP00000353512,9606.ENSP00000360869,9606.ENSP00000360883,9606.ENSP00000360891,9606.ENSP00000368699,9606.ENSP00000369299,9606.ENSP00000372136
GO:0002252	Immune effector process	10	969	1.26	2.53e-09	HERC5,CAMP,PARP9,IFIT1,IFIT3,IFIT2,LCN2,ISG15,TRIM22,DEFA1B	9606.ENSP00000264350,9606.ENSP00000296435,9606.ENSP00000353512,9606.ENSP00000360869,9606.ENSP00000360883,9606.ENSP00000360891,9606.ENSP00000362108,9606.ENSP00000368699,9606.ENSP00000369299,9606.ENSP00000372136
GO:0060337	Type i interferon signaling pathway	4	67	2.03	4.72e-05	IFIT1,IFIT3,IFIT2,ISG15	9606.ENSP00000360869,9606.ENSP00000360883,9606.ENSP00000360891,9606.ENSP00000368699
GO:0019221	Cytokine-mediated signaling pathway	6	678	1.2	0.00051	IFIT1,IFIT3,IFIT2,LCN2,ISG15,TRIM22	9606.ENSP00000360869,9606.ENSP00000360883,9606.ENSP00000360891,9606.ENSP00000362108,9606.ENSP00000368699,9606.ENSP00000369299
GO:0032020	ISG15-protein conjugation	2	6	2.77	0.0052	HERC5,ISG15	9606.ENSP00000264350,9606.ENSP00000368699
GO:0042742	Defense response to bacterium	4	277	1.41	0.0072	CAMP,LCN2,ISG15,DEFA1B	9606.ENSP00000296435,9606.ENSP00000362108,9606.ENSP00000368699,9606.ENSP00000372136
GO:0050688	Regulation of defense response to virus	3	81	1.82	0.0072	HERC5,PARP9,IFIT1	9606.ENSP00000264350,9606.ENSP00000353512,9606.ENSP00000360869
GO:1903900	Regulation of viral life cycle	3	153	1.54	0.0386	IFIT1,ISG15,TRIM22	9606.ENSP00000360869,9606.ENSP00000368699,9606.ENSP00000369299
GO:0019730	Antimicrobial humoral response	3	160	1.52	0.0394	CAMP,LCN2,DEFA1B	9606.ENSP00000296435,9606.ENSP00000362108,9606.ENSP00000372136
